# Supplementary material for: Enhanced anti-metastatic bioactivity of an IGF-TRAP re-engineered to improve physicochemical properties
Source: PubMed Central journal article supplement (PMC6255772; doi:10.1038/s41598-018-35407-2), 2018-11-26
Supplement: 41598_2018_35407_MOESM1_ESM.pdf [file 41598_2018_35407_MOESM1_ESM.pdf]

## Enhanced anti-metastatic bioactivity of an IGF-Trap re-engineered to improve physicochemical properties

George Vaniotis<sup>1\*</sup>, Serge Moffett<sup>1\*</sup>, Traian Sulea<sup>4,6\*</sup>, Ni Wang<sup>1\*</sup>, S. Mehdy Elahi<sup>\*6</sup>, Etienne Lessard<sup>6</sup>, Jason Baardsnes<sup>6</sup>, Stephanie Perrino<sup>1</sup>, Yves Durocher<sup>6</sup>, Jan Frystyk<sup>7</sup>, Bernard Massie<sup>6</sup> and Pnina Brodt<sup>1,2,3,5,#&</sup>.

Departments of <sup>1</sup>Surgery, <sup>2</sup>Medicine and <sup>3</sup>Oncology, and <sup>4</sup>Institute of Parasitology, McGill University and <sup>5</sup>Cancer Research Program, Research Institute of the McGill University Health Center, Montreal Quebec, Canada, <sup>6</sup>Human Health Therapeutics Research Centre, National Research Council Canada, Montreal Quebec, Canada, and <sup>7</sup>Department of Clinical Medicine, Aarhus University, Aarhus, Denmark

**Running Title:** Distinct pharmacodynamic properties of bio-engineered IGF-TRAPs

\* These authors contributed equally to this work.

& The authors of this manuscript have no competing financial or non-financial interests to report.

# **To whom all inquiries should be addressed at:** Research Institute of the McGill University

Health Centre, 1001 Décarie Blvd, Glen Site, Room E.02.6220, Montréal, QC, H4A 3J1,

Canada. Telephone: (514) 934-1934 (Ext. 36692) Fax: (514) 934-4460 Email:

pnina.brodt@mcgill.ca

This study was supported by grant PP2-141724 from the Canadian Institute for Health Research, and grant IT04483 from MITACS (to PB) and by Amorchem Inc.

## Supplementary Figure legends

**Figure S1. A proposed 3D model of the IGF-TRAP.** The extracellular domain of IGF-1R and the fused Fc domain of human IgG<sub>1</sub> are based on the known crystal structures of the ectodomain of hIR and the Fc domain of a hIgG<sub>1</sub>, respectively.

**Figure S2. IGF-TRAPs 3.1 and 3.3 bind to the FcRn with similar affinities.** Shown are SPR sensorgrams of IGF-TRAP 3.1 and IGF-TRAP 3.3 flowing over 80 RUs of C-terminally biotinylated FcRn on a neutravidin sensor surface. The apparent  $K_D$ 's based on an equilibrium fit gave similar results for each of the two IGF-TRAPs.

**Figure S3. IGF-TRAP 3.3 injections alter circulating growth hormone (GH) levels.** Blood was collected daily from mice injected with 0.5 or 10 mg/kg IGF-TRAP 3.3 on alternate days, as indicated. Shown are mean circulating GH levels ( $\pm$ SD) based on 3 animals per time point as measured by ELISA.

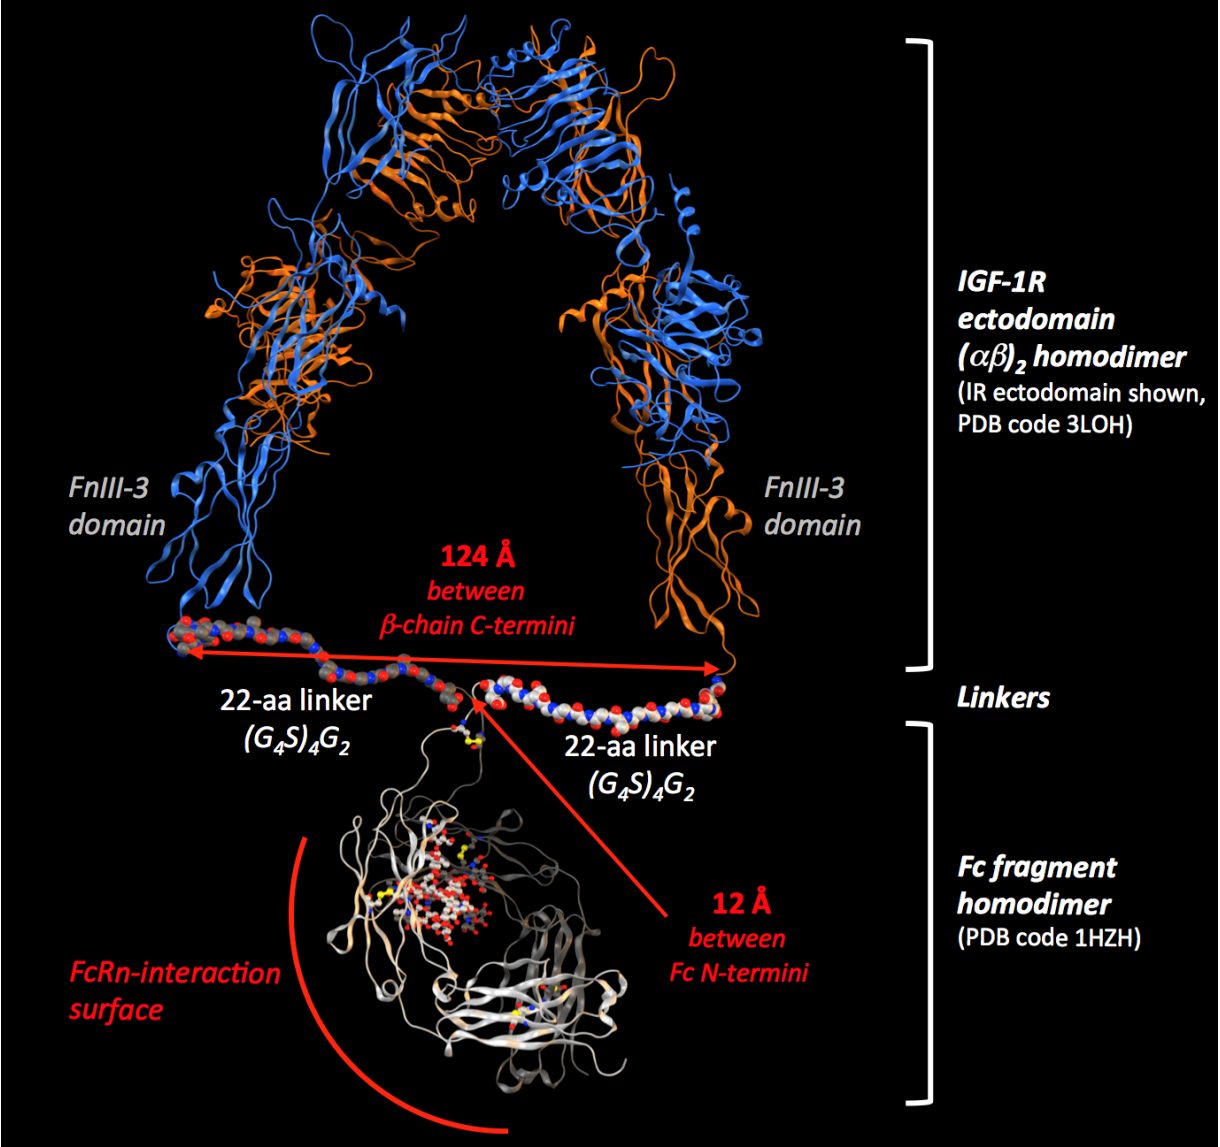

Supplementary Fig S1

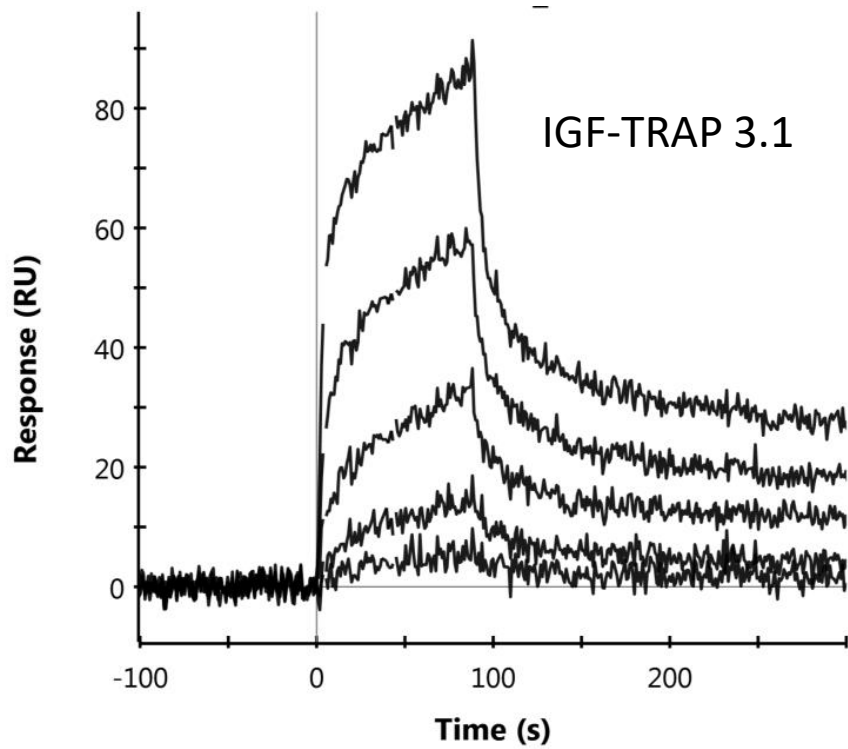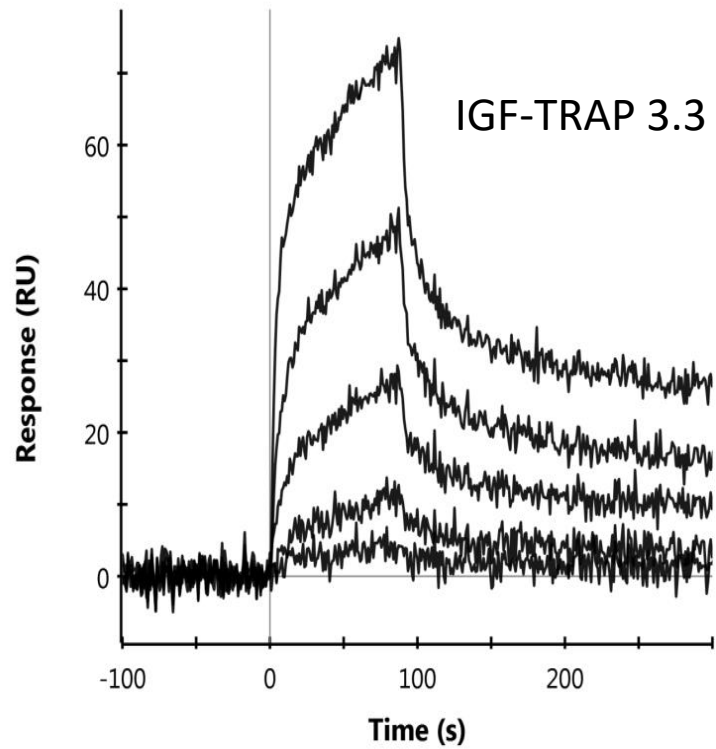

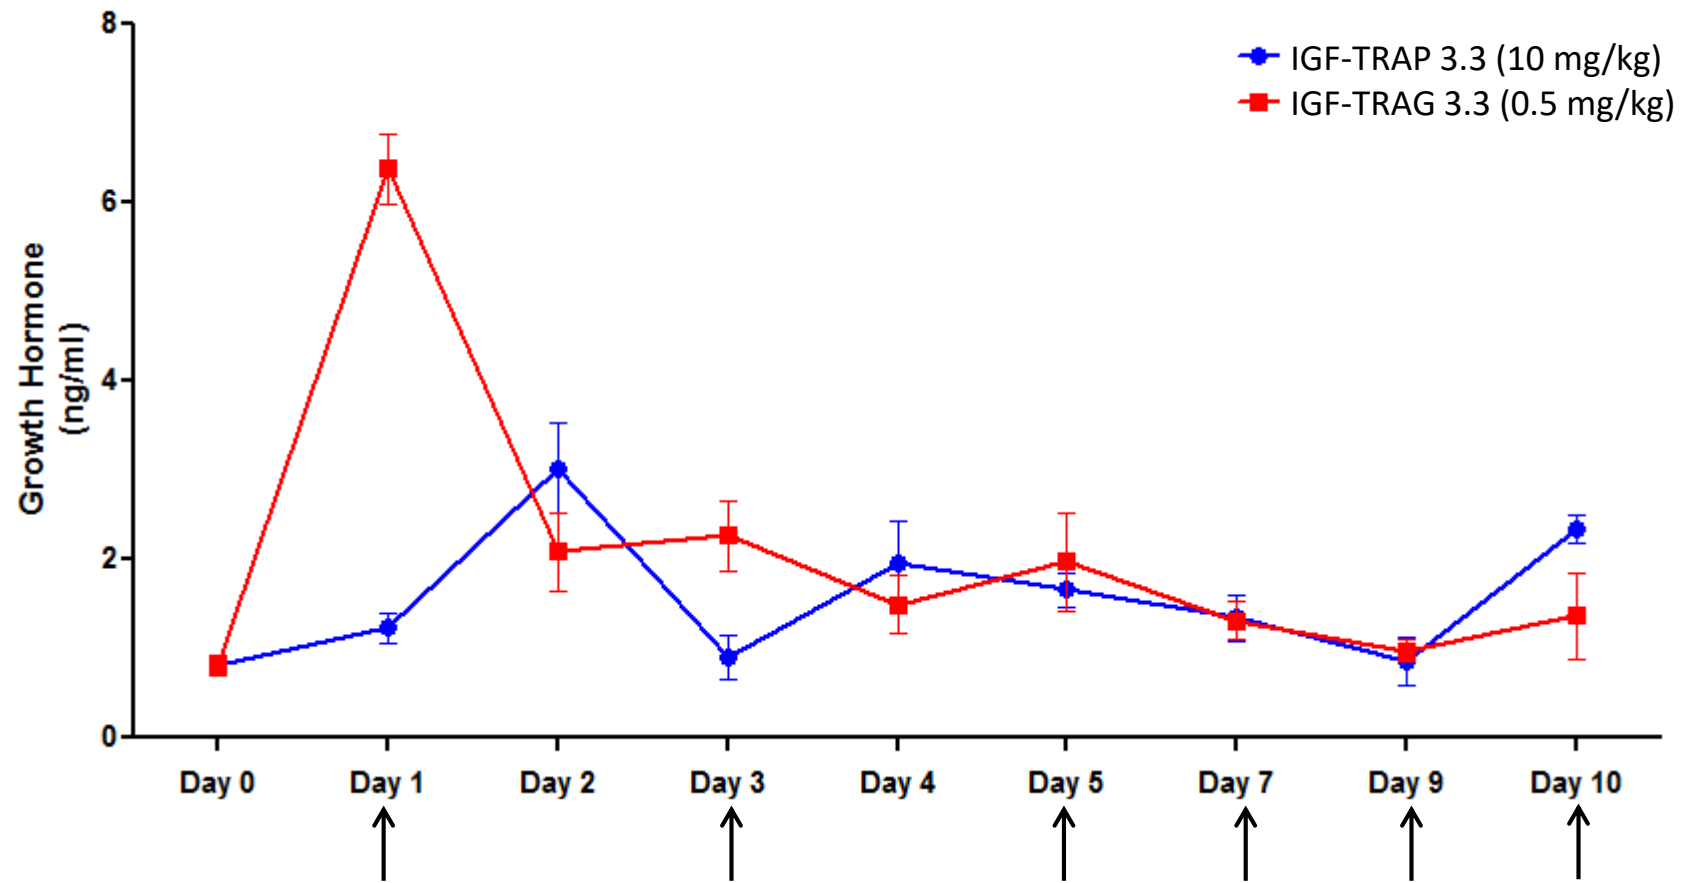

**Supplementary Fig S3**
